# Supplementary material for: A National Audit of Typical Secondary School Provision of Physical Education, Physical Activity and Sports in the Republic of Ireland
Source: MDPI journal article supplement (doi:10.3390/educsci13070699), 2023-07-09
Supplement: s1 [file s1]

# School Physical Education, Physical Activity and Sports Provision Evaluation Index

---

## Section A Demographics

---

Q1. What is your gender?

- ☐ Male (1)
- ☐ Female (2)
- ☐ Other (3)
- ☐ Prefer Not to Say (4)
- 

Q2. Staff/Student Ratio (Per Class)

|                                                                                   | Staff                        | Students            |
|-----------------------------------------------------------------------------------|------------------------------|---------------------|
| What is the Average Staff/Student Ratio Per Class in Your School? (E.g. 1:10) (1) | ▼ 4 Stone (1 ... 4 Stone (1) | ▼ 5 (1 ... 30 + (6) |

---

Q3. What is your school roll number? **(NB: Please obtain correct school roll number from school secretary)**

---

Q4. What is your employment status?

- ☐ Full-Time (1)
- ☐ Part-Time/Job-Share (2)
- ☐ Voluntary (3)
- 

Q5. What are your qualifications?

- ☐ Qualified Teacher with PE Specialization (1)
- ☐ Qualified Teacher with no PE Specialization (2)
- ☐ No Teaching Qualification (E.g. FAS trainee, NCEF personnel) (3)
- 

Q6. What is your position in PE/Sport Department?

- ☐ Head PE Teacher (1)
- ☐ PE Teacher (2)
- ☐ Support Staff (3)
- 

Q7. For how many years have you been teaching (Including Part-Time/Job-Share)?

---

Q8. For how many years have you been teaching in your current school (Including Part-Time/Job-Share)?

---

---

Page Break

## Section B Personnel

Q1. What is the total number of qualified teachers in your school?

---

Q2. What is the total number of qualified PE teachers in your school?

---

Q3. What is the total number of school personnel who contribute to the provision of PE, PA and sport?  
Please insert "0" where appropriate:

(**Physical Education** is planned, progressive learning that is defined by a curriculum, timetabled during school time and delivered by qualified teachers. **School Sport** involves participating in or preparing for school sport competitions. **School Physical Activity** is any other bodily movement produced by skeletal muscle that result in energy expenditure related to the school setting (Not Competitions), including active recess, active transport, active classroom breaks and extra-curricular physical activities etc.).

|                                      | PE (1) | PA (2) | Sport (3) |
|--------------------------------------|--------|--------|-----------|
| Full-Time Personnel (5)              |        |        |           |
| Part-Time/Job-Share<br>Personnel (6) |        |        |           |
| Voluntary Personnel (7)              |        |        |           |

Q4. What is the maximum, minimum and average number of pupils who attend PE classes?

|                                    | Maximum (1) | Minimum (2) | Average (3) |
|------------------------------------|-------------|-------------|-------------|
| Number of Pupils in PE Classes (1) |             |             |             |

Q5. What is the maximum, minimum, average number of pupils with Special Educational Needs (SEN) who attend PE classes?

|                                           | Maximum (1) | Minimum (2) | Average (3) |
|-------------------------------------------|-------------|-------------|-------------|
| Number of Pupils with SEN in PE Class (1) |             |             |             |

Q6. Approximately how many of the following are teaching timetabled PE classes in your school? Please insert "0" where appropriate:

|                                                 | Number Teaching PE (1) |
|-------------------------------------------------|------------------------|
| Qualified Teacher with PE Specialization (1)    |                        |
| Qualified Teacher with no PE Specialization (2) |                        |
| No Teaching Qualification (3)                   |                        |

Q7. Do qualified PE teachers teach another subject. If so please estimate the % of total teaching hours allocated to the additional subject/s (Non PE). Please insert "NA" where appropriate.

|                  | % of Total Teaching Hours Allocated to the 2nd Subjects (2) |
|------------------|-------------------------------------------------------------|
| PE Teacher 1 (1) |                                                             |
| PE Teacher 2 (2) |                                                             |
| PE Teacher 3 (3) |                                                             |
| PE Teacher 4 (4) |                                                             |
| PE Teacher 5 (5) |                                                             |

Q8. Approximately how many of the following are involved in the provision of school sport in your school?  
Please insert "0" where appropriate:

|                                                 | Number of individuals involved in the provision of school sport (1) |
|-------------------------------------------------|---------------------------------------------------------------------|
| Qualified Teacher with PE Specialization (1)    |                                                                     |
| Qualified Teacher with no PE Specialization (5) |                                                                     |
| No Teaching Qualification (3)                   |                                                                     |

Q9. Approximately how many of the following are involved in the provision of PA in your school and the what are the number of different extra-curricular activities weekly? Please insert "0" where appropriate:

|                                                 | Number of individuals involved in the provision of extra-curricular activity (1) | Total number of different extra-curricular activities per week (2) |
|-------------------------------------------------|----------------------------------------------------------------------------------|--------------------------------------------------------------------|
| Qualified Teacher with PE Specialization (1)    |                                                                                  |                                                                    |
| Qualified Teacher with no PE Specialization (5) |                                                                                  |                                                                    |
| No Teaching Qualification (3)                   |                                                                                  |                                                                    |

### **Section C Curriculum**

---

**Physical Education** (Physical Education is planned, progressive learning that is defined by a curriculum, timetabled during school time and delivered by qualified professionals).

---

#### **Curriculum Contents**

---

Q1. Does your school implement LCPE (Leaving Cert Physical Education)? Please select one that applies:

- ☐ Yes We Do (1)
  - ☐ We Intend To (2)
  - ☐ No Plan to Implement (3)
-

Q2. Please select activities you have done during timetabled Junior Cycle PE and Senior Cycle PE?  
Select all that apply:



|                                                          | Junior Cycle PE (1)      | Senior Cycle PE (2)      |
|----------------------------------------------------------|--------------------------|--------------------------|
| Adventure Activities (e.g., orienteering, canoeing). (1) | <input type="checkbox"/> | <input type="checkbox"/> |
| Aerobics (2)                                             | <input type="checkbox"/> | <input type="checkbox"/> |
| Athletics (3)                                            | <input type="checkbox"/> | <input type="checkbox"/> |
| Badminton (4)                                            | <input type="checkbox"/> | <input type="checkbox"/> |
| Baseball or Rounders (5)                                 | <input type="checkbox"/> | <input type="checkbox"/> |
| Basketball (6)                                           | <input type="checkbox"/> | <input type="checkbox"/> |
| Canoage (7)                                              | <input type="checkbox"/> | <input type="checkbox"/> |
| Cross Country Running (8)                                | <input type="checkbox"/> | <input type="checkbox"/> |
| Dance (9)                                                | <input type="checkbox"/> | <input type="checkbox"/> |
| Gaelic Football (10)                                     | <input type="checkbox"/> | <input type="checkbox"/> |
| Gymnastics (11)                                          | <input type="checkbox"/> | <input type="checkbox"/> |
| Handball (12)                                            | <input type="checkbox"/> | <input type="checkbox"/> |
| Hockey (13)                                              | <input type="checkbox"/> | <input type="checkbox"/> |
| Horse Riding (14)                                        | <input type="checkbox"/> | <input type="checkbox"/> |

|                                                       |                          |                          |
|-------------------------------------------------------|--------------------------|--------------------------|
| Hurling (15)                                          | <input type="checkbox"/> | <input type="checkbox"/> |
| Martial Arts (16)                                     | <input type="checkbox"/> | <input type="checkbox"/> |
| Rugby (17)                                            | <input type="checkbox"/> | <input type="checkbox"/> |
| Soccer (18)                                           | <input type="checkbox"/> | <input type="checkbox"/> |
| Squash (19)                                           | <input type="checkbox"/> | <input type="checkbox"/> |
| Swimming (20)                                         | <input type="checkbox"/> | <input type="checkbox"/> |
| Tennis (21)                                           | <input type="checkbox"/> | <input type="checkbox"/> |
| Weight Training (22)                                  | <input type="checkbox"/> | <input type="checkbox"/> |
| Physical Activity and Sport<br>Knowledge (23)         | <input type="checkbox"/> | <input type="checkbox"/> |
| Theory in Relation to Health-<br>Related Fitness (24) | <input type="checkbox"/> | <input type="checkbox"/> |

## Assessment and Grading

---

Q1. How long has it been since your school last received a Department of Education PE inspection?

|                                                                                                   | 0-5 Years (1)         | 6-10 Years (2)        | 11-15 Years (3)       |
|---------------------------------------------------------------------------------------------------|-----------------------|-----------------------|-----------------------|
| How long has it been since your school last received a Department of Education PE inspection? (4) | <input type="radio"/> | <input type="radio"/> | <input type="radio"/> |

---

Q2. Is there formal classroom-based assessments for Junior Cycle PE (e.g. profile of achievements) and Senior Cycle PE (Non-LCPE) (e.g. portfolio)? Please select all that apply:

|                     | Yes (1)               | No (2)                |
|---------------------|-----------------------|-----------------------|
| Junior Cycle PE (1) | <input type="radio"/> | <input type="radio"/> |
| Senior Cycle PE (2) | <input type="radio"/> | <input type="radio"/> |

---

## **Learning Outcomes**

Q1. To what extent does your school achieve the stated learning outcomes for **Junior Cycle PE**? Please respond to the questions by selecting a number between 1 and 5, where **1 means does not achieve and 5 means easily achieved**:

|                                                                                                        | 1 (2)                 | 2 (3)                 | 3 (4)                 | 4 (5)                 | 5 (6)                 |
|--------------------------------------------------------------------------------------------------------|-----------------------|-----------------------|-----------------------|-----------------------|-----------------------|
| Competence in performance corresponding to pupil's abilities (1)                                       | <input type="radio"/> |
| Creative and aesthetic knowledge pertaining to PA (2)                                                  | <input type="radio"/> |
| Decision making regarding PA in a tactical context (3)                                                 | <input type="radio"/> |
| Understanding of principles, rules and purpose of types of PA and the criteria for mastery of each (4) | <input type="radio"/> |
| An understanding of the theoretical knowledge relevant to PE (5)                                       | <input type="radio"/> |
| Life-long participation in PA (6)                                                                      | <input type="radio"/> |
| Moral and social development, fairness and tolerance towards others (7)                                | <input type="radio"/> |
| Development of a positive sense of self (8)                                                            | <input type="radio"/> |
| Development a positive healthy lifestyle (9)                                                           | <input type="radio"/> |

Development  
of physical  
fitness (10)

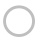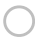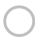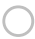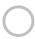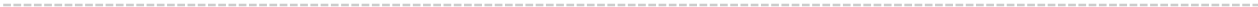

Q2. To what extent does your school achieve the stated learning outcomes for **Senior Cycle PE**? Please respond to the questions by selecting a number between 1 and 5, where **1 means does not achieve and 5 means easily achieved**:

|                                                                                                        | 1 (2)                 | 2 (3)                 | 3 (4)                 | 4 (5)                 | 5 (6)                 |
|--------------------------------------------------------------------------------------------------------|-----------------------|-----------------------|-----------------------|-----------------------|-----------------------|
| Competence in performance corresponding to pupil's abilities (1)                                       | <input type="radio"/> |
| Creative and aesthetic knowledge pertaining to PA (2)                                                  | <input type="radio"/> |
| Decision making regarding PA in a tactical context (3)                                                 | <input type="radio"/> |
| Understanding of principles, rules and purpose of types of PA and the criteria for mastery of each (4) | <input type="radio"/> |
| An understanding of the theoretical knowledge relevant to PE (5)                                       | <input type="radio"/> |
| Life-long participation in PA (6)                                                                      | <input type="radio"/> |
| Moral and social development, fairness and tolerance towards others (7)                                | <input type="radio"/> |
| Development of a positive sense of self (8)                                                            | <input type="radio"/> |
| Development a positive healthy lifestyle (9)                                                           | <input type="radio"/> |



Development  
of physical  
fitness (10)

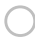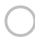

Q3. To what extent does your school achieve the stated learning outcomes for **LCPE**? Please respond to the questions by selecting a number between 1 and 5, **where 1 means does not achieve and 5 means easily achieved (Select NA where appropriate)**:

|                                                                                                        | 1 (2)                 | 2 (3)                 | 3 (4)                 | 4 (5)                 | 5 (6)                 | NA (7)                |
|--------------------------------------------------------------------------------------------------------|-----------------------|-----------------------|-----------------------|-----------------------|-----------------------|-----------------------|
| Competence in performance corresponding to pupil's abilities (1)                                       | <input type="radio"/> |
| Creative and aesthetic knowledge pertaining to PA (2)                                                  | <input type="radio"/> |
| Decision making regarding PA in a tactical context (3)                                                 | <input type="radio"/> |
| Understanding of principles, rules and purpose of types of PA and the criteria for mastery of each (4) | <input type="radio"/> |
| An understanding of the theoretical knowledge relevant to PE (5)                                       | <input type="radio"/> |
| Life-long participation in PA (6)                                                                      | <input type="radio"/> |
| Moral and social development, fairness and tolerance towards others (7)                                | <input type="radio"/> |
| Development of a positive sense of self (8)                                                            | <input type="radio"/> |

Development  
a positive  
healthy  
lifestyle (9)

☐☐☐☐☐☐

Development  
of physical  
fitness (10)

☐☐☐☐☐☐

---

**Field Trips** (A School Field Trip is an event or activity where students leave the school grounds for the purposes of curriculum-related study e.g., adventure activities)

---

Q1. Does your school organize field trips as part of the PE curriculum?

☐ Never (1)

☐ Occasionally (1-2 per year) (2)

☐ Regularly (3 or more per year) (3)

---

**Allocated Time & Attendance**

Q1. For each year group in your school what is the average class total minutes per week and is it compulsory to participate? Please insert 'Not Applicable' (NA) where PE is not provided:

|              | Average Class Total Minutes<br>Per Week (2) | Compulsory Participation (Y/N)<br>(3) |
|--------------|---------------------------------------------|---------------------------------------|
| 1st Year (1) |                                             |                                       |
| 2nd Year (2) |                                             |                                       |
| 3rd Year (3) |                                             |                                       |
| 4th Year (4) |                                             |                                       |
| 5th Year (5) |                                             |                                       |
| 6th Year (6) |                                             |                                       |
| LCPE (7)     |                                             |                                       |

-----

Q2. On average, what percentage of students per year group do not regularly participate in PE?

|                 | 0% (1)                | 1-5% (2)              | 6-10% (3)             | 11-14% (4)            | 15% + (5)             |
|-----------------|-----------------------|-----------------------|-----------------------|-----------------------|-----------------------|
| First Year (2)  | <input type="radio"/> |
| Second Year (3) | <input type="radio"/> |
| Third Year (4)  | <input type="radio"/> |
| Fourth Year (5) | <input type="radio"/> |
| Fifth Year (6)  | <input type="radio"/> |
| Sixth Year (7)  | <input type="radio"/> |

---

### **Status of PE**

Q1. For each of the following questions please respond by selecting a number between 1 and 5, where **1 means strongly disagree** and **5 means strongly agree**:

|                                                                                             | 1 (2)                 | 2 (3)                 | 3 (4)                 | 4 (5)                 | 5 (6)                 |
|---------------------------------------------------------------------------------------------|-----------------------|-----------------------|-----------------------|-----------------------|-----------------------|
| PE is valued by staff in my school (1)                                                      | <input type="radio"/> |
| PE is valued by pupils in my school (2)                                                     | <input type="radio"/> |
| PE is valued by the principal in my school (3)                                              | <input type="radio"/> |
| PE is valued by parents of pupils in my school (4)                                          | <input type="radio"/> |
| PE enjoys a similar status to other subjects taught in my school (5)                        | <input type="radio"/> |
| PE classes are more likely to be cancelled than other subjects (6)                          | <input type="radio"/> |
| PE teachers enjoy similar status to other subject teachers in my school (7)                 | <input type="radio"/> |
| PE teachers in my school are involved in defining total time allocation of PE provision (8) | <input type="radio"/> |
| PE should be a compulsory subject for pupils at Junior Cycle (9)                            | <input type="radio"/> |



PE should be  
a compulsory  
subject for  
pupils at  
Senior Cycle  
(10)

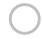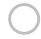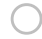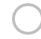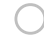

My school  
formally  
provides  
information  
about the  
benefits of PE  
to the pupils  
(13)

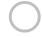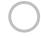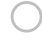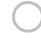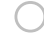

**School Sports** (School Sport involves participating in or preparing for school competitions).

---

**Time, Activities, Provision, Competition**

---

Q1. Please answer the below questions in relation to school sport time, activities, provision and competition? Respond to the question by selecting a number between 1 and 5, where **1 means Never** and **5 means Very Often**:

|                                                                                                  | 1 (1)                 | 2 (2)                 | 3 (3)                 | 4 (4)                 | 5 (5)                 |
|--------------------------------------------------------------------------------------------------|-----------------------|-----------------------|-----------------------|-----------------------|-----------------------|
| Do the pupils have to pay to participate in school sport offered? (1)                            | <input type="radio"/> |
| Does your school organize sport related training camps outside school grounds? (2)               | <input type="radio"/> |
| Does regular collaboration exist between school sports teams and the PE department? (3)          | <input type="radio"/> |
| Does the school cater for Individuals with movement challenges in school sport competitions? (4) | <input type="radio"/> |

---

Q2. Please select the school sports activities your school provides from the list below? Select all that apply:

- ☐ Adventure activities (e.g. orienteering, canoeing) (1)
- ☐ Aerobics (2)
- ☐ Athletics (3)
- ☐ Badminton (4)
- ☐ Baseball or Rounders (5)
- ☐ Basketball (6)
- ☐ Camogie (7)
- ☐ Cross Country Running (8)
- ☐ Dance (9)
- ☐ Gaelic Football (10)
- ☐ Gymnastics (11)
- ☐ Handball (12)
- ☐ Hockey (13)
- ☐ Horse Riding (14)
- ☐ Hurling (15)
- ☐ Martial Arts (16)
- ☐ Rugby (17)

- ☐ Soccer (18)
- ☐ Squash (19)
- ☐ Swimming (20)
- ☐ Tennis (21)
- ☐ Weight Training (22)

Q3. Estimate the percentage of pupils involved in school sport activities weekly? Please insert "NA" where appropriate:

|                  | Boys % Estimation (1) | Girls % Estimation (2) | Total % Estimation (3) |
|------------------|-----------------------|------------------------|------------------------|
| Junior Cycle (4) |                       |                        |                        |
| Senior Cycle (6) |                       |                        |                        |

Q4. What is the total time allocated to all school sports activities per week provided by your school? Select one that applies:

- ☐ 0 Hours Per Week (1)
- ☐ 1-5 Hours Per Week (2)
- ☐ 6-10 Hours Per Week (3)
- ☐ 11-14 Hours Per Week (4)
- ☐ More Than 15 Hours Per Week (5)

---

Q5. Does the school formally provide information about the benefits of sport to the pupils:

☐ Yes (1)

☐ No (2)

---

Q6. When are school sports competitions held? Tick all that apply:

☐ In School Settings, During School Hours (1)

☐ In School Settings, Outside School Hours (2)

☐ In School Settings, During the Weekend (4)

☐ Do Not Compete (5)

---

**Other Opportunities for Physical Activity** (School Physical Activity is any other bodily movement produced by skeletal muscle that result in energy expenditure within the school setting (**Not Competitions**), including active recess, active transport, active classroom breaks and extra-curricular physical activities etc.).

Q1. Please answer the below questions in relation to other forms of Physical Activity in school? Please respond to the question by selecting a number between 1 and 5, where **1 means never** and **5 means very often**:

|                                                                                                                                                                                                     | 1 (1)                 | 2 (2)                 | 3 (3)                 | 4 (4)                 | 5 (5)                 |
|-----------------------------------------------------------------------------------------------------------------------------------------------------------------------------------------------------|-----------------------|-----------------------|-----------------------|-----------------------|-----------------------|
| Is PA used in other subjects (Non-PE) to promote/facilitate learning? (1)                                                                                                                           | <input type="radio"/> |
| Does your school implement break-time activities? (2)                                                                                                                                               | <input type="radio"/> |
| Does your school provide extracurricular PA in addition to PE and school sports? (3)                                                                                                                | <input type="radio"/> |
| Do the pupils have to pay to participate in extracurricular PA? (4)                                                                                                                                 | <input type="radio"/> |
| Does the school promote active transport to and from school? (Active Transport is defined as any walking, jogging or pedal biking for purposes other than enjoyment (e.g. travelling to school) (5) | <input type="radio"/> |
| Does the school formally organize active transport? (6)                                                                                                                                             | <input type="radio"/> |
| Does the school formally provide information about the benefits of active transport to the pupils? (7)                                                                                              | <input type="radio"/> |

---

Q2. Estimate the percentage of pupils involved in extracurricular PA weekly? Please insert "NA" where appropriate:

|                  | Boys Estimation (1) | Girls Estimation (2) | Total Estimation (3) |
|------------------|---------------------|----------------------|----------------------|
| Junior Cycle (1) |                     |                      |                      |
| Senior Cycle (2) |                     |                      |                      |

---

Q3. What is the total weekly time allocated to extracurricular PA offered by your school:

- ☐ 0 Hours per Week (1)
- ☐ 1-5 Hours Per Week (2)
- ☐ 6-10 Hours Per Week (3)
- ☐ 11-14 Hours Per Week (4)
- ☐ More Than 15 Hours Per Week (5)

---

Page Break

## Section D Facilities and Equipment

### Adequacy

Q1. Please describe the hall spaces available for PE, PA and sport within your school? Please select one that applies:

|                 | No Indoor Space (1)   | 84m <sup>2</sup> (13.4m x 6)<br>(Approx 1 Badminton Court) (2) | 170m <sup>2</sup> (10m x 17m)<br>(Approx 2 Badminton Courts) (3) | 405m <sup>2</sup> (15.6m x 26m)<br>(Approx 3 Badminton Courts) (4) | 608m <sup>2</sup> (19m x 32m) or greater<br>(Approx 4 Badminton Courts) (5) |
|-----------------|-----------------------|----------------------------------------------------------------|------------------------------------------------------------------|--------------------------------------------------------------------|-----------------------------------------------------------------------------|
| Hall Spaces (1) | <input type="radio"/> | <input type="radio"/>                                          | <input type="radio"/>                                            | <input type="radio"/>                                              | <input type="radio"/>                                                       |

Q2. Please state the number of outdoor spaces available for PE, PA and sport within your school property? Please list the number of courts/pitches that apply:

|                    | Tarmacadam Area     | Athletics Track     | All Weather Surface | Grass Pitches       |
|--------------------|---------------------|---------------------|---------------------|---------------------|
| Outdoor Spaces (2) | ▼ 0 (1 ... 3 + (4)) | ▼ 0 (1 ... 3 + (4)) | ▼ 0 (1 ... 3 + (4)) | ▼ 0 (1 ... 3 + (4)) |

Q3. Please describe the size of the swimming pool that is available for PE, PA and sport within your school property? Please select one that applies:

|                   | No Swimming Pool (1)  | 25m (2)               | 33m (3)               | 50m (4)               |
|-------------------|-----------------------|-----------------------|-----------------------|-----------------------|
| Swimming Pool (1) | <input type="radio"/> | <input type="radio"/> | <input type="radio"/> | <input type="radio"/> |



## Active transport

---

Q1. Please answer the below questions in relation to Active Transport:

|                                                                                                        | Yes (1)               | No (2)                |
|--------------------------------------------------------------------------------------------------------|-----------------------|-----------------------|
| Does the school surroundings have safe regulated ways for active transport (e.g., cycle pathways)? (1) | <input type="radio"/> | <input type="radio"/> |
| Does the school own facilities to accommodate active transport (e.g., bike parking, lockers)? (2)      | <input type="radio"/> | <input type="radio"/> |

---

## Access to Facilities and Equipment

---

Q1. For each of the following questions please respond by selecting a number between 1 and 5, where **1 means strongly disagree** and **5 means strongly agree**:

|                                                                                                                                      | 1 (1)                 | 2 (2)                 | 3 (3)                 | 4 (4)                 | 5 (5)                 |
|--------------------------------------------------------------------------------------------------------------------------------------|-----------------------|-----------------------|-----------------------|-----------------------|-----------------------|
| Pupils can use the school owned indoor/outdoor PE, PA and sport facilities and equipment during recess. (1)                          | <input type="radio"/> |
| Pupils can use the school owned indoor/outdoor PE, PA and sport facilities and equipment outside of school time. (2)                 | <input type="radio"/> |
| There is consistent access to school owned indoor and outdoor PE, PA and Sport facilities during timetables hours for provision. (3) | <input type="radio"/> |
| The current PE timetable contains PE classes that occur in the same space and at the same time as another PE class. (4)              | <input type="radio"/> |
| There is consistent access to school owned technological equipment for the purpose of PE. (5)                                        | <input type="radio"/> |

There is consistent access to school owned reliable broadband and internet access purpose of PE. (7)

|                       |                       |                       |                       |                       |
|-----------------------|-----------------------|-----------------------|-----------------------|-----------------------|
| <input type="radio"/> |
|-----------------------|-----------------------|-----------------------|-----------------------|-----------------------|

There are indoor spaces available for PE, PA and sport which you access from the community. (9)

|                       |                       |                       |                       |                       |
|-----------------------|-----------------------|-----------------------|-----------------------|-----------------------|
| <input type="radio"/> |
|-----------------------|-----------------------|-----------------------|-----------------------|-----------------------|

There are outdoor spaces available for PE, PA and sport which you access from the community. (10)

|                       |                       |                       |                       |                       |
|-----------------------|-----------------------|-----------------------|-----------------------|-----------------------|
| <input type="radio"/> |
|-----------------------|-----------------------|-----------------------|-----------------------|-----------------------|

There are swimming pools available for PE, PA and sport which you access from the community. (11)

|                       |                       |                       |                       |                       |
|-----------------------|-----------------------|-----------------------|-----------------------|-----------------------|
| <input type="radio"/> |
|-----------------------|-----------------------|-----------------------|-----------------------|-----------------------|

There are outdoor adventure activities facilities available for PE, PA and sport which you access from the community. (12)

|                       |                       |                       |                       |                       |
|-----------------------|-----------------------|-----------------------|-----------------------|-----------------------|
| <input type="radio"/> |
|-----------------------|-----------------------|-----------------------|-----------------------|-----------------------|

## Health and Safety

---

Q1. Please select the appropriate box below by selecting your chosen number on a scale of 1 to 5, where **1 means never** and **5 means very often**:

|                                                                                                                   | 1 (1)                 | 2 (2)                 | 3 (3)                 | 4 (4)                 | 5 (5)                 |
|-------------------------------------------------------------------------------------------------------------------|-----------------------|-----------------------|-----------------------|-----------------------|-----------------------|
| Does the noise level in the indoor facility impede the ability to be able to teach effectively? (1)               | <input type="radio"/> |
| How often is it likely for an injury to occur during PE, PA and sport activities due to equipment conditions? (2) | <input type="radio"/> |
| Is it a challenge to implement health and safety in the context of provision? (3)                                 | <input type="radio"/> |
| Are facilities and equipment maintained on a regular basis? (4)                                                   | <input type="radio"/> |

---

Page Break

## Section E Budget

Q1. Please indicate if The Department of Education budget attained and percentage given towards PE, PA and sport provision are adequate? Please respond to the question by selecting a number between 1 and 5, where **1 means inadequate** and **5 means excellent**:

|                                                       | 1 (2)                 | 2 (3)                 | 3 (4)                 | 4 (5)                 | 5 (6)                 |
|-------------------------------------------------------|-----------------------|-----------------------|-----------------------|-----------------------|-----------------------|
| The Department of Education Budget Attained (1)       | <input type="radio"/> |
| Percentage given towards school PE, PA and Sport. (2) | <input type="radio"/> |

Q2. Please indicate if additional sources of the budget attained (non-Department of Education) and percentage given towards PE, PA and sport provision are adequate? Please respond to the question by selecting a number between 1 and 5, where **1 means inadequate** and **5 means excellent**:

|                                                       | 1 (1)                 | 2 (2)                 | 3 (3)                 | 4 (4)                 | 5 (5)                 |
|-------------------------------------------------------|-----------------------|-----------------------|-----------------------|-----------------------|-----------------------|
| Non-Department of Education Budget Attained. (1)      | <input type="radio"/> |
| Percentage given towards school PE, PA and Sport. (2) | <input type="radio"/> |

Q3. Please indicate if past investments made by your school in indoor and outdoor school PE, PA and sport facilities and equipment are adequate? Please respond to the question by selecting a number between 1 and 5, where **1 means inadequate** and **5 means excellent**:

|                        | 1 (1)                 | 2 (2)                 | 3 (3)                 | 4 (4)                 | 5 (5)                 |
|------------------------|-----------------------|-----------------------|-----------------------|-----------------------|-----------------------|
| Facilities Indoor (1)  | <input type="radio"/> |
| Facilities Outdoor (2) | <input type="radio"/> |
| Equipment Indoor (3)   | <input type="radio"/> |
| Equipment Outdoor (4)  | <input type="radio"/> |

Page Break

## Section F Partnerships

---

### Parents

---

Q1. How often does the school engage with parents to improve PE, PA and sport provision for the pupils in respect of the following? Please respond to the question by selecting a number between 1 and 5, where **1 means never** and **5 means very often**:

|                                                            | 1 (1)                 | 2 (2)                 | 3 (3)                 | 4 (4)                 | 5 (5)                 |
|------------------------------------------------------------|-----------------------|-----------------------|-----------------------|-----------------------|-----------------------|
| Promotion of participation in school PE, PA and sport. (1) | <input type="radio"/> |
| Support of school sport Activities. (2)                    | <input type="radio"/> |
| Facilitation of Active Transport (3)                       | <input type="radio"/> |

---



## Government

Q1. Within the last 5 years, how often has your school received Department of Education support to improve PE, PA and sport provision in respect of the following? Please respond to the question by selecting a number between 1 and 5, where **1 means never** and **5 means very often**:

|                                                                                      | 1 (1)                 | 2 (2)                 | 3 (3)                 | 4 (4)                 | 5 (5)                 |
|--------------------------------------------------------------------------------------|-----------------------|-----------------------|-----------------------|-----------------------|-----------------------|
| Continuous Professional Development (CPD) for school PE, PA and sport provision. (1) | <input type="radio"/> |
| Budget for school PE, PA and sport Facilities (4)                                    | <input type="radio"/> |
| Budget for PE, PA and school sport equipment (5)                                     | <input type="radio"/> |

---

## National Governing Bodies

---

Q1. Within the last 5 years, how often has your school received support from National Sporting Organisations (e.g., The GAA, IRFU, FAI, Sport Ireland) to improve PE, PA and sport provision in respect

of the following? Please respond to the question by selecting a number between 1 and 5, where **1 means never** and **5 means very often**:

|                                                                     | 1 (1)                 | 2 (2)                 | 3 (3)                 | 4 (4)                 | 5 (5)                 |
|---------------------------------------------------------------------|-----------------------|-----------------------|-----------------------|-----------------------|-----------------------|
| Contributing to teaching pupils during PE class time (1)            | <input type="radio"/> |
| Coaching or organising extracurricular PA and school sport time (2) | <input type="radio"/> |
| Awarding coaching badges to school staff/pupils (5)                 | <input type="radio"/> |
| Engaging with Local Sports Partnerships (13)                        | <input type="radio"/> |
| Organizing extra-curricular PA and sport events (6)                 | <input type="radio"/> |
| Monitoring/evaluation of extra-curricular settings (10)             | <input type="radio"/> |
| Supporting access to NGB local facilities (12)                      | <input type="radio"/> |

## Inter-School

Q1. Within the last 5 years, how often has your school joined with other school/s to improve PE, PA and sport provision in respect of the following? Please respond to the question by selecting a number between 1 and 5, where **1 means never** and **5 means very often** :

|                                   | 1 (1)                 | 2 (2)                 | 3 (3)                 | 4 (4)                 | 5 (5)                 |
|-----------------------------------|-----------------------|-----------------------|-----------------------|-----------------------|-----------------------|
| PE Subject Provision (1)          | <input type="radio"/> |
| School Sports Provision (2)       | <input type="radio"/> |
| School PA Provision (3)           | <input type="radio"/> |
| CPD (e.g. meetings, training) (6) | <input type="radio"/> |
| Budget (7)                        | <input type="radio"/> |
| Provision of Equipment (8)        | <input type="radio"/> |
| Provision of Facilities (9)       | <input type="radio"/> |

---

## Higher Education Institutes and Research Centers

---

Q1. In the last 5 years, how often has your school received support from Higher Education Institutions and/or Research Centres to improve PE, PA and sport provision in respect of the following? Please

respond to the question by selecting a number between 1 and 5, where **1 means never** and **5 means very often**:

|                                                    | 1 (1)                 | 2 (2)                 | 3 (3)                 | 4 (4)                 | 5 (5)                 |
|----------------------------------------------------|-----------------------|-----------------------|-----------------------|-----------------------|-----------------------|
| Provision of Teaching Practice Placement (1)       | <input type="radio"/> |
| Provision of CPD for PE, PA and sport teachers (2) | <input type="radio"/> |
| Research (of mutual benefit) (5)                   | <input type="radio"/> |

Page Break

## Section G School Ethos and Prioritization of PE, PA and Sport

**\*All 10-point scales below should be perceived as a % grading scale, progressing towards 100% e.g. 1=10%, 2=20%, 3=30%, etc.**

Q1. How much importance do you feel is placed on participation in and promotion of PE, PA and sport as a strategic priority by your school (Please respond to the question by selecting a number on a scale of 0 to 10, where **0 means not at all important** and **10 means that it is of the highest importance**):

|              | 0<br>(0%)<br>(1)      | 1<br>(10%)<br>(2)     | 2<br>(20%)<br>(3)     | 3<br>(30%)<br>(4)     | 4<br>(40%)<br>(5)     | 5<br>(50%)<br>(6)     | 6<br>(60%)<br>(7)     | 7<br>(70%)<br>(8)     | 8<br>(80%)<br>(9)     | 9<br>(90%)<br>(10)    | 10<br>(100%)<br>(11)  |
|--------------|-----------------------|-----------------------|-----------------------|-----------------------|-----------------------|-----------------------|-----------------------|-----------------------|-----------------------|-----------------------|-----------------------|
| PE<br>(1)    | <input type="radio"/> |
| PA<br>(2)    | <input type="radio"/> |
| Sport<br>(3) | <input type="radio"/> |

Q2. Please grade the following aspects of PE Provision for pupils in your school:

|                                                                   | 0<br>(0<br>%)<br>(1) | 1<br>(10<br>%)<br>(2) | 2<br>(20<br>%)<br>(3) | 3<br>(30<br>%)<br>(4) | 4<br>(40<br>%)<br>(5) | 5<br>(50<br>%)<br>(6) | 6<br>(60<br>%)<br>(7) | 7<br>(70<br>%)<br>(8) | 8<br>(80<br>%)<br>(9) | 9<br>(90<br>%)<br>(10) | 10<br>(100<br>%)<br>(11) |
|-------------------------------------------------------------------|----------------------|-----------------------|-----------------------|-----------------------|-----------------------|-----------------------|-----------------------|-----------------------|-----------------------|------------------------|--------------------------|
| Provision of PE Curriculum content.<br>(1)                        | (                    | C                     | C                     | C                     | C                     | C                     | C                     | C                     | C                     | C                      | O                        |
| Provision of PE Assessment and Grading (2)                        | (                    | C                     | C                     | C                     | C                     | C                     | C                     | C                     | C                     | C                      | O                        |
| Achieving PE Learning Outcomes (3)                                | (                    | C                     | C                     | C                     | C                     | C                     | C                     | C                     | C                     | C                      | O                        |
| Provision of PE related Field Trips (4)                           | (                    | C                     | C                     | C                     | C                     | C                     | C                     | C                     | C                     | C                      | O                        |
| Dedicated time toward PE Provision (5)                            | (                    | C                     | C                     | C                     | C                     | C                     | C                     | C                     | C                     | C                      | O                        |
| Overall School Support toward PE, PA and sport provision (6)      | (                    | C                     | C                     | C                     | C                     | C                     | C                     | C                     | C                     | C                      | O                        |
| Accessibility/Opportunities for Individuals with Disabilities (7) | (                    | C                     | C                     | C                     | C                     | C                     | C                     | C                     | C                     | C                      | O                        |
| Participation of Students with Disabilities (10)                  | (                    | C                     | C                     | C                     | C                     | C                     | C                     | C                     | C                     | C                      | O                        |
| Overall Student Participation (8)                                 | (                    | C                     | C                     | C                     | C                     | C                     | C                     | C                     | C                     | C                      | O                        |
| Policies to ensure gender equity (12)                             | (                    | C                     | C                     | C                     | C                     | C                     | C                     | C                     | C                     | C                      | O                        |
| Overall Rating of School PE Provision (13)                        | (                    | C                     | C                     | C                     | C                     | C                     | C                     | C                     | C                     | C                      | O                        |

---

Q3. Please grade the following aspects of Sport Provision for pupils in your school:

|                                                                      | 0<br>(0<br>%)<br>(1) | 1<br>(10<br>%)<br>(2) | 2<br>(20<br>%)<br>(3) | 3<br>(30<br>%)<br>(4) | 4<br>(40<br>%)<br>(5) | 5<br>(50<br>%)<br>(6) | 6<br>(60<br>%)<br>(7) | 7<br>(70<br>%)<br>(8) | 8<br>(80<br>%)<br>(9) | 9<br>(90<br>%)<br>(10) | 10<br>(100<br>%)<br>(11) |
|----------------------------------------------------------------------|----------------------|-----------------------|-----------------------|-----------------------|-----------------------|-----------------------|-----------------------|-----------------------|-----------------------|------------------------|--------------------------|
| Provision of Outdoor Sport (1)                                       | (                    | C                     | C                     | C                     | C                     | C                     | C                     | C                     | C                     | C                      | O                        |
| Provision of Indoor Sport (15)                                       | (                    | C                     | C                     | C                     | C                     | C                     | C                     | C                     | C                     | C                      | O                        |
| Sport Clubs for Males (Please select "0%" if female school type) (3) | (                    | C                     | C                     | C                     | C                     | C                     | C                     | C                     | C                     | C                      | O                        |
| Sport Clubs for Females (Please select "0%" if male school type) (4) | (                    | C                     | C                     | C                     | C                     | C                     | C                     | C                     | C                     | C                      | O                        |
| Range of Sport Competitions (5)                                      | (                    | C                     | C                     | C                     | C                     | C                     | C                     | C                     | C                     | C                      | O                        |
| Accessibility/Opportunities for Individuals with Disabilities (7)    | (                    | C                     | C                     | C                     | C                     | C                     | C                     | C                     | C                     | C                      | O                        |
| Participation of Students with Disabilities (11)                     | (                    | C                     | C                     | C                     | C                     | C                     | C                     | C                     | C                     | C                      | O                        |
| Overall Student Participation (9)                                    | (                    | C                     | C                     | C                     | C                     | C                     | C                     | C                     | C                     | C                      | O                        |
| Policies to ensure gender equity (13)                                | (                    | C                     | C                     | C                     | C                     | C                     | C                     | C                     | C                     | C                      | O                        |
| Overall Rating of School Sport Provision (14)                        | (                    | C                     | C                     | C                     | C                     | C                     | C                     | C                     | C                     | C                      | O                        |

---

Q4. Please grade the following aspects of PA Provision for pupils in your school:

|                                                                   | 0<br>(0<br>%)<br>(1) | 1<br>(10<br>%)<br>(2) | 2<br>(20<br>%)<br>(3) | 3<br>(30<br>%)<br>(4) | 4<br>(40<br>%)<br>(5) | 5<br>(50<br>%)<br>(6) | 6<br>(60<br>%)<br>(7) | 7<br>(70<br>%)<br>(8) | 8<br>(80<br>%)<br>(9) | 9<br>(90<br>%)<br>(10) | 10<br>(100<br>%)<br>(11) |
|-------------------------------------------------------------------|----------------------|-----------------------|-----------------------|-----------------------|-----------------------|-----------------------|-----------------------|-----------------------|-----------------------|------------------------|--------------------------|
| Exercise and Fitness Opportunities (1)                            | (                    | C                     | C                     | C                     | C                     | C                     | C                     | C                     | C                     | C                      | O                        |
| Classroom Physically Based Active learning and Active Breaks (2)  | (                    | C                     | C                     | C                     | C                     | C                     | C                     | C                     | C                     | C                      | O                        |
| Active Recess (3)                                                 | (                    | C                     | C                     | C                     | C                     | C                     | C                     | C                     | C                     | C                      | O                        |
| Extracurricular Activities (4)                                    | (                    | C                     | C                     | C                     | C                     | C                     | C                     | C                     | C                     | C                      | O                        |
| Accessibility/Opportunities for Individuals with Disabilities (5) | (                    | C                     | C                     | C                     | C                     | C                     | C                     | C                     | C                     | C                      | O                        |
| Active Transport (6)                                              | (                    | C                     | C                     | C                     | C                     | C                     | C                     | C                     | C                     | C                      | O                        |
| Policies to ensure gender equity (7)                              | (                    | C                     | C                     | C                     | C                     | C                     | C                     | C                     | C                     | C                      | O                        |
| Overall Rating of School PA Provision (8)                         | (                    | C                     | C                     | C                     | C                     | C                     | C                     | C                     | C                     | C                      | O                        |

---



Q5. Please grade the following other aspects of PE, PA and Sport Provision for pupils in your school:

|                              | 0<br>(0%<br>) (1)     | 1<br>(10%<br>) (2)    | 2<br>(20%<br>) (3)    | 3<br>(30%<br>) (4)    | 4<br>(40%<br>) (5)    | 5<br>(50%<br>) (6)    | 6<br>(60%<br>) (7)    | 7<br>(70%<br>) (8)    | 8<br>(80%<br>) (9)    | 9<br>(90%<br>) (10)   | 10<br>(100%<br>) (11) |
|------------------------------|-----------------------|-----------------------|-----------------------|-----------------------|-----------------------|-----------------------|-----------------------|-----------------------|-----------------------|-----------------------|-----------------------|
| Indoor<br>Facilities<br>(1)  | <input type="radio"/> |
| Outdoor<br>Facilities<br>(2) | <input type="radio"/> |
| Equipmen<br>t<br>(3)         | <input type="radio"/> |
| Budget<br>(4)                | <input type="radio"/> |
| School<br>Support<br>(5)     | <input type="radio"/> |
| Staffing<br>(6)              | <input type="radio"/> |

Page Break
