# Supplementary material for: A National Audit of Typical Secondary School Provision of Physical Education, Physical Activity and Sports in the Republic of Ireland
Source: MDPI journal article supplement (doi:10.3390/educsci13070699), 2023-07-09
Supplement: s1 [file s1]

Archive with 1 entries (1 files):
- education-2439598-supplementary.pdf
